# Supplementary material for: Pathogen-derived extracellular vesicles mediate virulence in the fatal human pathogen Cryptococcus gattii
Source: PubMed Central journal article supplement (PMC5908794; doi:10.1038/s41467-018-03991-6), 2018-04-19
Supplement: 41467_2018_3991_MOESM3_ESM.pdf [file 41467_2018_3991_MOESM3_ESM.pdf]

## **Description of Additional Supplementary Files**

File Name: Supplementary Movie 1

Description: Three-dimensional visualisation of fungal EV<sub>S<sub>R</sub>265</sub> immunostained in MAb 18B7 in a murine macrophage after 30-minutes incubation. Bar: 5  $\mu$ m.
